# Supplementary material for: Multi-syndrome, multi-gene risk modeling for individuals with a family history of cancer with the novel R package PanelPRO
Source: eLife journal article supplement (doi:10.7554/elife.68699), 2021-08-18
Supplement: supp [file elife-68699-supp-v1.zip › elife_poa_e68699_Figure_5_figure_supplement_2.pdf]

The probability of being a carrier is 0.08413597  
an BRCA1 carrier 0.01542652  
an BRCA2 carrier 0.06864427

The risks of developing cancers are

|   | By age | Breast Ca Risk | Ovarian Ca Risk |
|---|--------|----------------|-----------------|
| 1 | 47     | 0.01648123     | 0.002469347     |
| 2 | 52     | 0.03462178     | 0.005933700     |
| 3 | 57     | 0.05340994     | 0.010317119     |
| 4 | 62     | 0.07390337     | 0.015610797     |
| 5 | 67     | 0.09700316     | 0.021610329     |
| 6 | 72     | 0.12145238     | 0.027874332     |
| 7 | 77     | 0.14523317     | 0.034013010     |
| 8 | 82     | 0.16717575     | 0.039669689     |
