# Supplementary material for: Multi-syndrome, multi-gene risk modeling for individuals with a family history of cancer with the novel R package PanelPRO
Source: eLife journal article supplement (doi:10.7554/elife.68699), 2021-08-18
Supplement: supp [file elife-68699-supp-v1.zip › elife_poa_e68699_Figure_6_figure_supplement_2.pdf]

The probability of being a carrier is 0.001580029  
an BRCA1 carrier 0.0002703445  
an BRCA2 carrier 0.00130957

The risks of developing cancers are

|   | By age | Breast Ca Risk | Ovarian Ca Risk |
|---|--------|----------------|-----------------|
| 1 | 45     | 0.006572291    | 0.0004217971    |
| 2 | 50     | 0.015891758    | 0.0010528788    |
| 3 | 55     | 0.026972221    | 0.0019223001    |
| 4 | 60     | 0.039980789    | 0.0029599045    |
| 5 | 65     | 0.056356417    | 0.0041905525    |
| 6 | 70     | 0.075886924    | 0.0055870951    |
| 7 | 75     | 0.096358753    | 0.0070503362    |
| 8 | 80     | 0.115737185    | 0.0084747935    |
| 9 | 85     | 0.133155346    | 0.0096944310    |
