# Supplementary material for: Multi-syndrome, multi-gene risk modeling for individuals with a family history of cancer with the novel R package PanelPRO
Source: eLife journal article supplement (doi:10.7554/elife.68699), 2021-08-18
Supplement: supp [file elife-68699-supp-v1.zip › elife_poa_e68699_Figure_6_figure_supplement_3.pdf]

The probability of being a carrier is 0.2061321  
an MLH1 carrier 0.04880847  
an MSH2 carrier 0.03695193  
an MSH6 carrier 0.1205266

The risks of developing cancers are

|   | By age | Colorectal Ca Risk | Endometrial Ca Risk |
|---|--------|--------------------|---------------------|
| 1 | 45     | 0.005688626        | 0.004298499         |
| 2 | 50     | 0.012676831        | 0.013381598         |
| 3 | 55     | 0.021164934        | 0.029293702         |
| 4 | 60     | 0.030543025        | 0.050498735         |
| 5 | 65     | 0.041199714        | 0.071285447         |
| 6 | 70     | 0.053498039        | 0.088437059         |
| 7 | 75     | 0.067450643        | 0.101805362         |
| 8 | 80     | 0.083071514        | 0.112199249         |
| 9 | 85     | 0.099776723        | 0.120140646         |
