# Supplementary material for: Multi-syndrome, multi-gene risk modeling for individuals with a family history of cancer with the novel R package PanelPRO
Source: eLife journal article supplement (doi:10.7554/elife.68699), 2021-08-18
Supplement: supp [file elife-68699-supp-v1.zip › elife_poa_e68699_Figure_7_figure_supplement_2.pdf]

The probability of being a carrier is 0.4628848  
an MLH1 carrier 0.194761  
an MSH2 carrier 0.2816022  
an MSH6 carrier 0.01033524

The risks of developing cancers are

|   | By age | Colorectal Ca Risk | Endometrial Ca Risk |
|---|--------|--------------------|---------------------|
| 1 | 47     | 0.03445840         | 0                   |
| 2 | 52     | 0.07203364         | 0                   |
| 3 | 57     | 0.11128953         | 0                   |
| 4 | 62     | 0.15050284         | 0                   |
| 5 | 67     | 0.18849635         | 0                   |
| 6 | 72     | 0.22396761         | 0                   |
| 7 | 77     | 0.25683262         | 0                   |
| 8 | 82     | 0.28716254         | 0                   |
