# Supplementary material for: Multi-syndrome, multi-gene risk modeling for individuals with a family history of cancer with the novel R package PanelPRO
Source: eLife journal article supplement (doi:10.7554/elife.68699), 2021-08-18
Supplement: supp [file elife-68699-supp-v1.zip › elife_poa_e68699_Figure_8_figure_supplement_2.pdf]

The probability of being a carrier is 0.0008172607  
an BRCA1 carrier 0.000255142  
an BRCA2 carrier 0.0005620065

The risks of developing cancers are

|   | By age | Breast Ca Risk | Ovarian Ca Risk |
|---|--------|----------------|-----------------|
| 1 | 45     | 0.006499522    | 0.0004114976    |
| 2 | 50     | 0.015746611    | 0.0010262354    |
| 3 | 55     | 0.026760732    | 0.0018738495    |
| 4 | 60     | 0.039710243    | 0.0028827538    |
| 5 | 65     | 0.056035711    | 0.0040777716    |
| 6 | 70     | 0.075525523    | 0.0054345843    |
| 7 | 75     | 0.095964195    | 0.0068571202    |
| 8 | 80     | 0.115312986    | 0.0082429226    |
| 9 | 85     | 0.132703141    | 0.0094294513    |
