# Supplementary material for: Multi-syndrome, multi-gene risk modeling for individuals with a family history of cancer with the novel R package PanelPRO
Source: eLife journal article supplement (doi:10.7554/elife.68699), 2021-08-18
Supplement: supp [file elife-68699-supp-v1.zip › elife_poa_e68699_Figure_8_figure_supplement_3.pdf]

The probability of being a carrier is 0.004601897  
an MLH1 carrier 0.001930921  
an MSH2 carrier 0.002165547  
an MSH6 carrier 0.0005065349

The risks of developing cancers are

| By age |    | Colorectal Ca Risk | Endometrial Ca Risk |
|--------|----|--------------------|---------------------|
| 1      | 45 | 0.001105048        | 0.0005902807        |
| 2      | 50 | 0.002895994        | 0.0017777487        |
| 3      | 55 | 0.005734708        | 0.0039158324        |
| 4      | 60 | 0.008861349        | 0.0070621071        |
| 5      | 65 | 0.012741624        | 0.0108913764        |
| 6      | 70 | 0.017809183        | 0.0147917437        |
| 7      | 75 | 0.024109483        | 0.0185124352        |
| 8      | 80 | 0.032246638        | 0.0218381976        |
| 9      | 85 | 0.042302384        | 0.0245340186        |
