# Supplementary material for: Multi-syndrome, multi-gene risk modeling for individuals with a family history of cancer with the novel R package PanelPRO
Source: eLife journal article supplement (doi:10.7554/elife.68699), 2021-08-18
Supplement: supp [file elife-68699-supp-v1.zip › elife_poa_e68699_Figure_9_figure_supplement_2.pdf]

The probability of being a carrier is 0.0003368059  
an BRCA1 carrier 0.0001074238  
an BRCA2 carrier 0.0002293612

The risks of developing cancers are

|   | By age | Breast Ca Risk | Ovarian Ca Risk |
|---|--------|----------------|-----------------|
| 1 | 53     | 0.01045033     | 0.0007473687    |
| 2 | 58     | 0.02254590     | 0.0016670426    |
| 3 | 63     | 0.03759567     | 0.0027608458    |
| 4 | 68     | 0.05624663     | 0.0040355127    |
| 5 | 73     | 0.07680950     | 0.0054148951    |
| 6 | 78     | 0.09696970     | 0.0068044141    |
| 7 | 83     | 0.11535707     | 0.0080751632    |
