# Supplementary material for: Multi-syndrome, multi-gene risk modeling for individuals with a family history of cancer with the novel R package PanelPRO
Source: eLife journal article supplement (doi:10.7554/elife.68699), 2021-08-18
Supplement: supp [file elife-68699-supp-v1.zip › elife_poa_e68699_Figure_9_figure_supplement_3.pdf]

The probability of being a carrier is 0.007097316  
an MLH1 carrier 0.00288398  
an MSH2 carrier 0.002499589  
an MSH6 carrier 0.001715274

The risks of developing cancers are

|   | By age | Colorectal Ca Risk | Endometrial Ca Risk |
|---|--------|--------------------|---------------------|
| 1 | 53     | 0.002579006        | 0.001932298         |
| 2 | 58     | 0.005714852        | 0.004960054         |
| 3 | 63     | 0.009345739        | 0.008864359         |
| 4 | 68     | 0.014055994        | 0.012982466         |
| 5 | 73     | 0.019949398        | 0.016917036         |
| 6 | 78     | 0.027448597        | 0.020520699         |
| 7 | 83     | 0.036885665        | 0.023555049         |
