# Supplementary figures and images for: Multi-syndrome, multi-gene risk modeling for individuals with a family history of cancer with the novel R package PanelPRO
Source: eLife journal article supplement (doi:10.7554/elife.68699), 2021-08-18

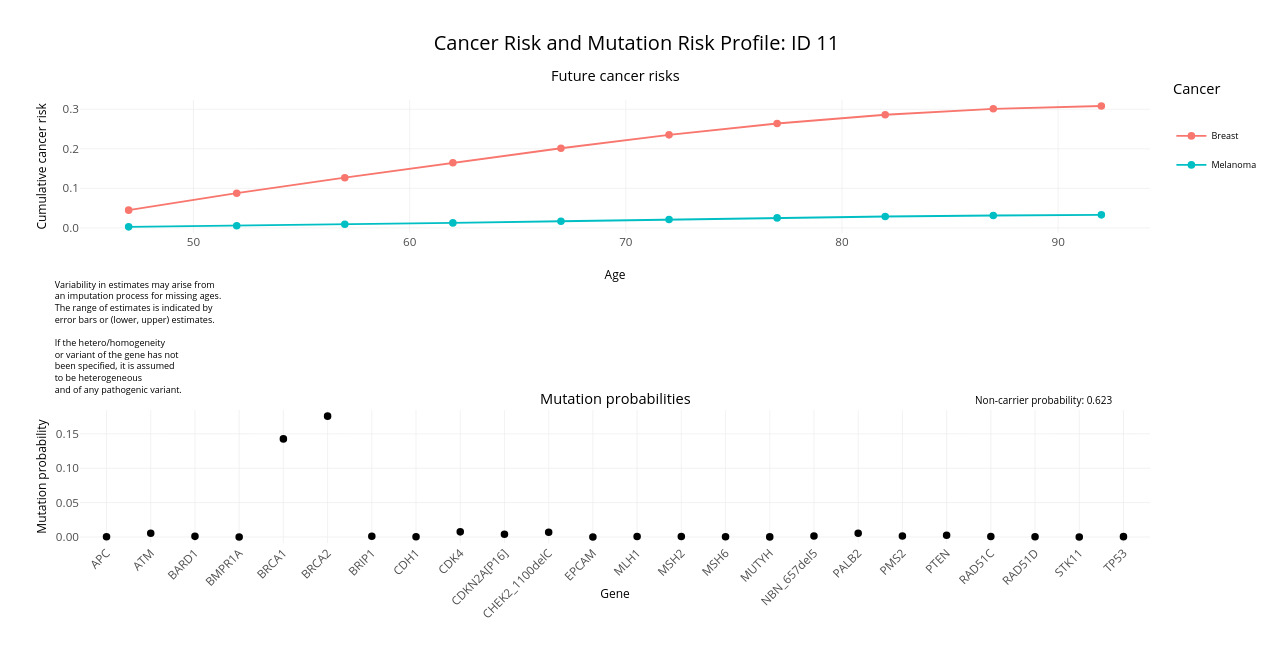

Supplement: supp [file elife-68699-supp-v1.zip › elife_poa_e68699_Figure_5_figure_supplement_1.jpg]

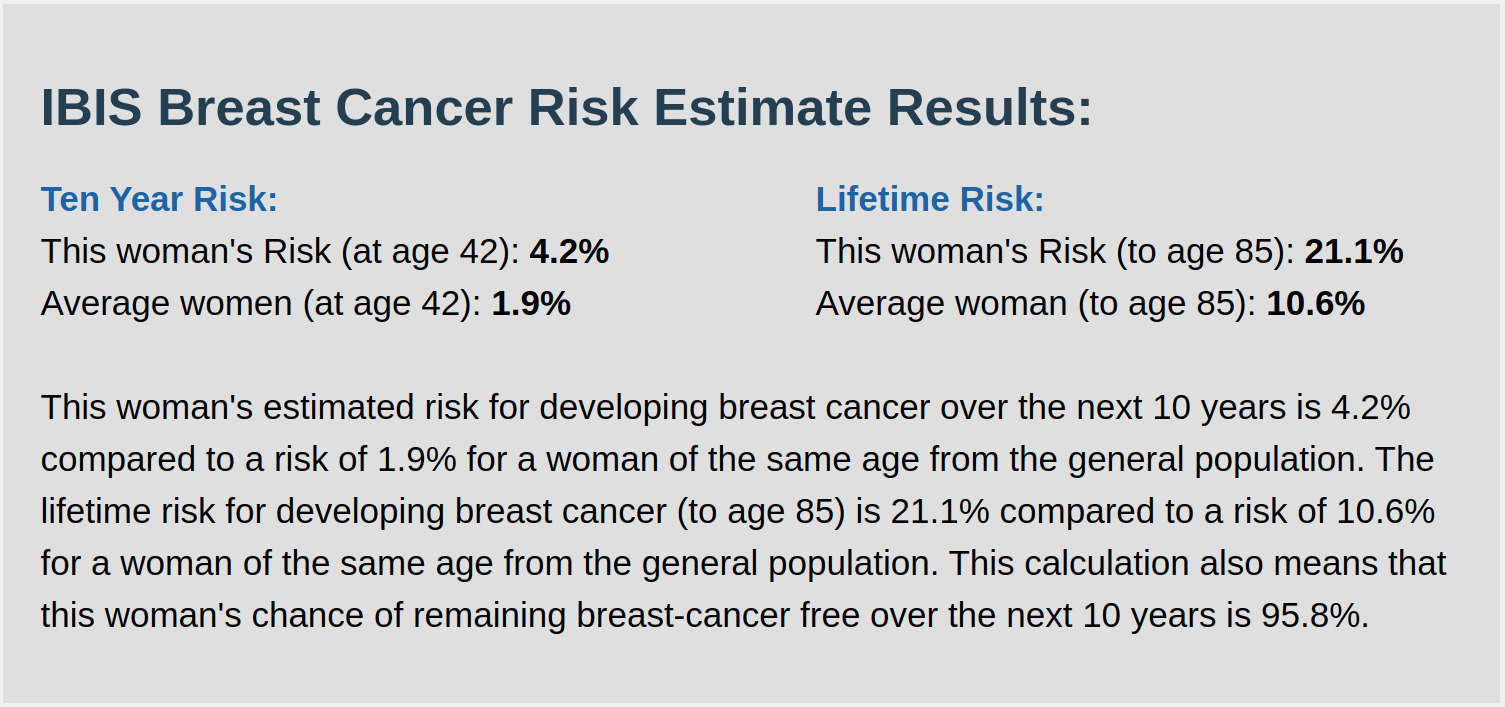

Supplement: supp [file elife-68699-supp-v1.zip › elife_poa_e68699_Figure_5_figure_supplement_3.jpg]

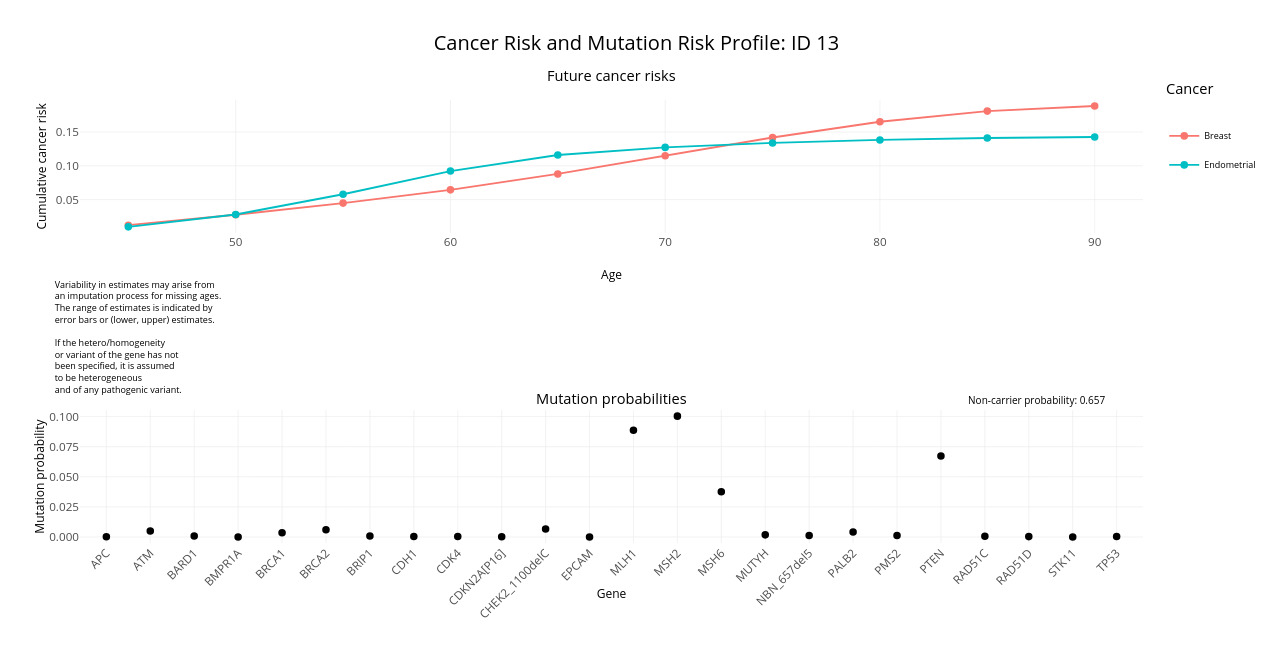

Supplement: supp [file elife-68699-supp-v1.zip › elife_poa_e68699_FifFigure_supplement_1.jpg]

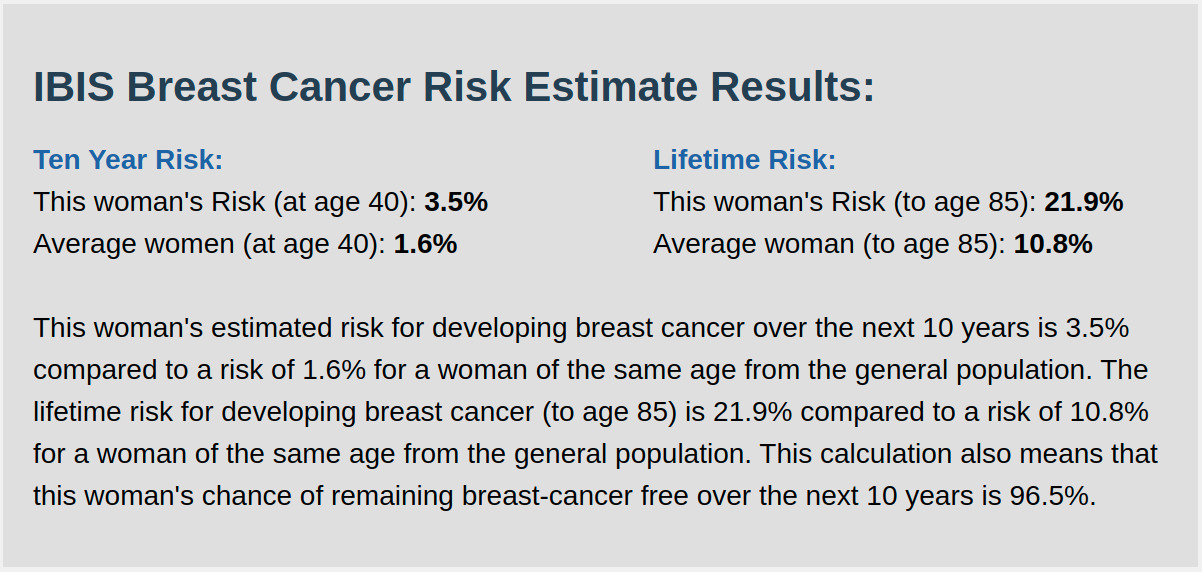

Supplement: supp [file elife-68699-supp-v1.zip › elife_poa_e68699_Figure_6_figure_supplement_4.jpg]

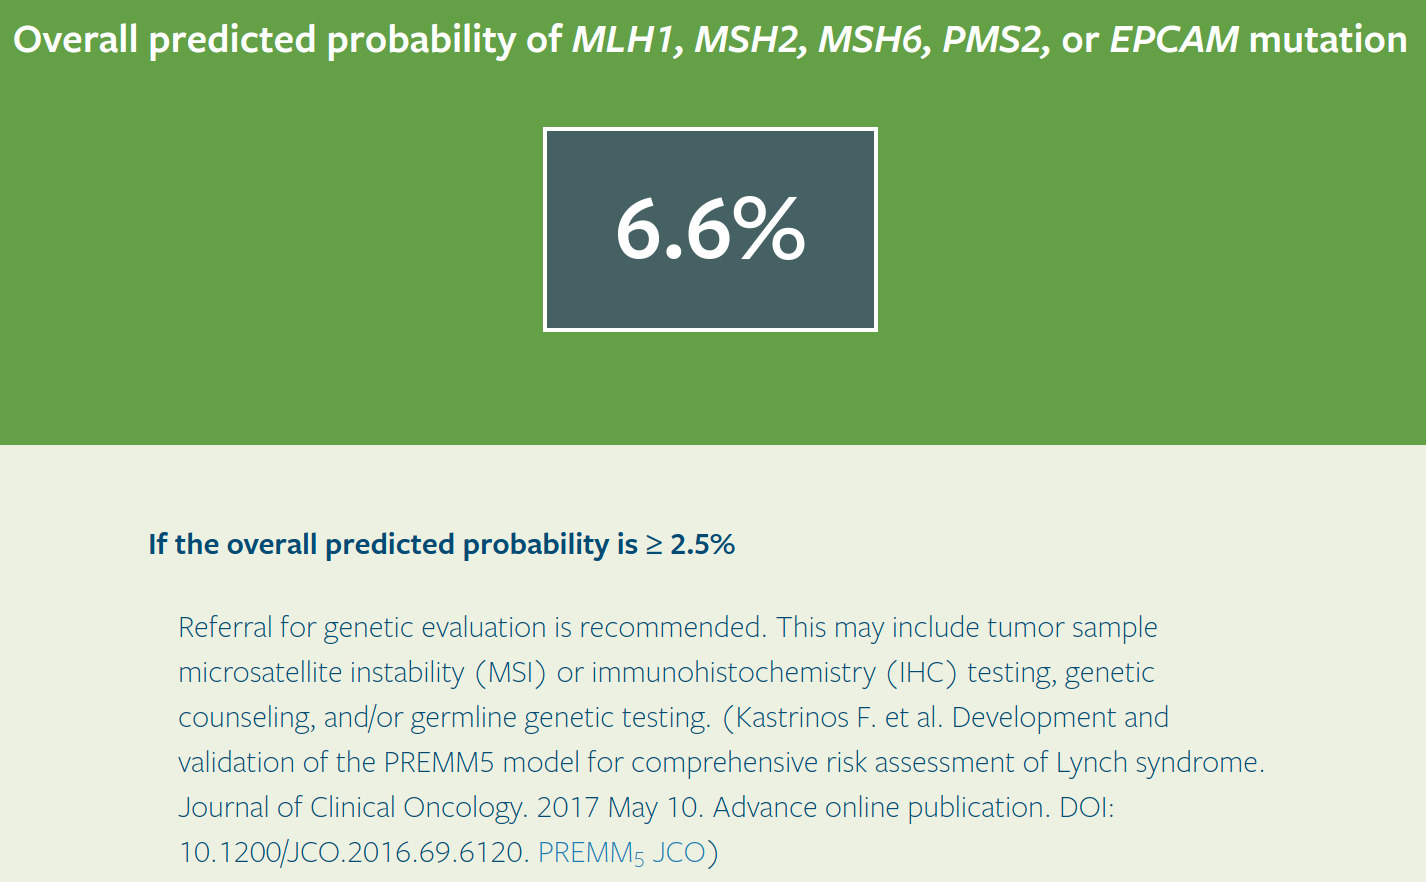

Supplement: supp [file elife-68699-supp-v1.zip › elife_poa_e68699_Figure_6_figure_supplement_5.jpg]

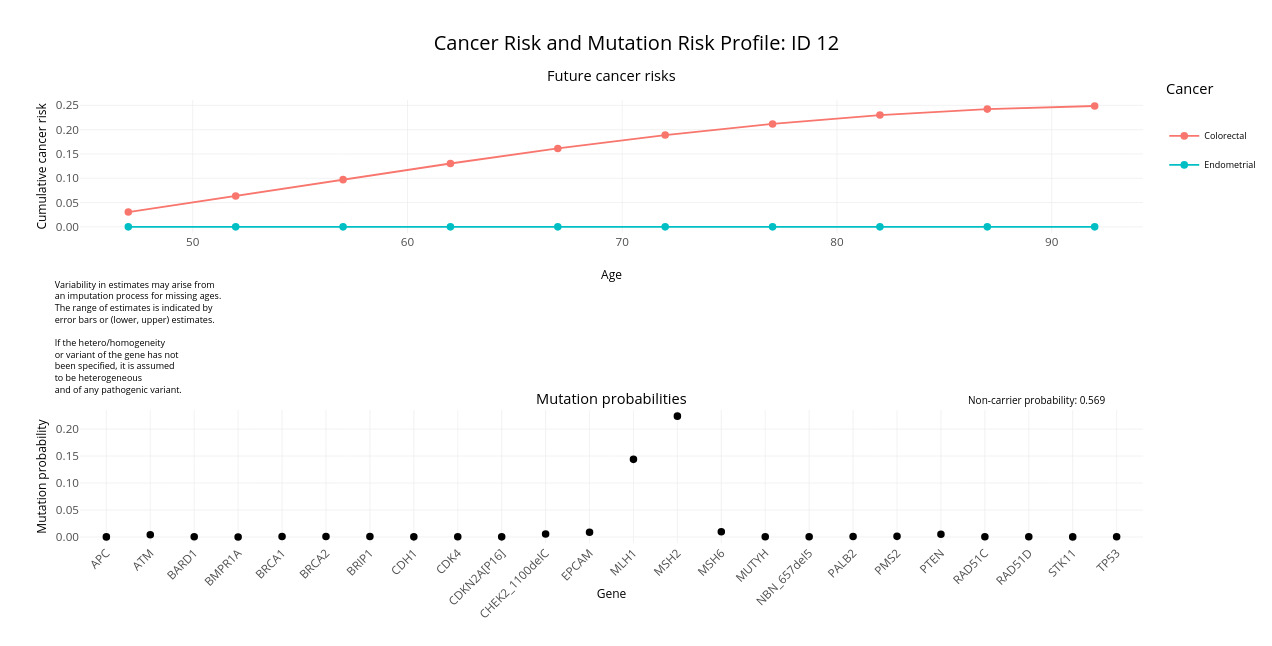

Supplement: supp [file elife-68699-supp-v1.zip › elife_poa_e68699_Figure_7_figure_supplement_1.jpg]

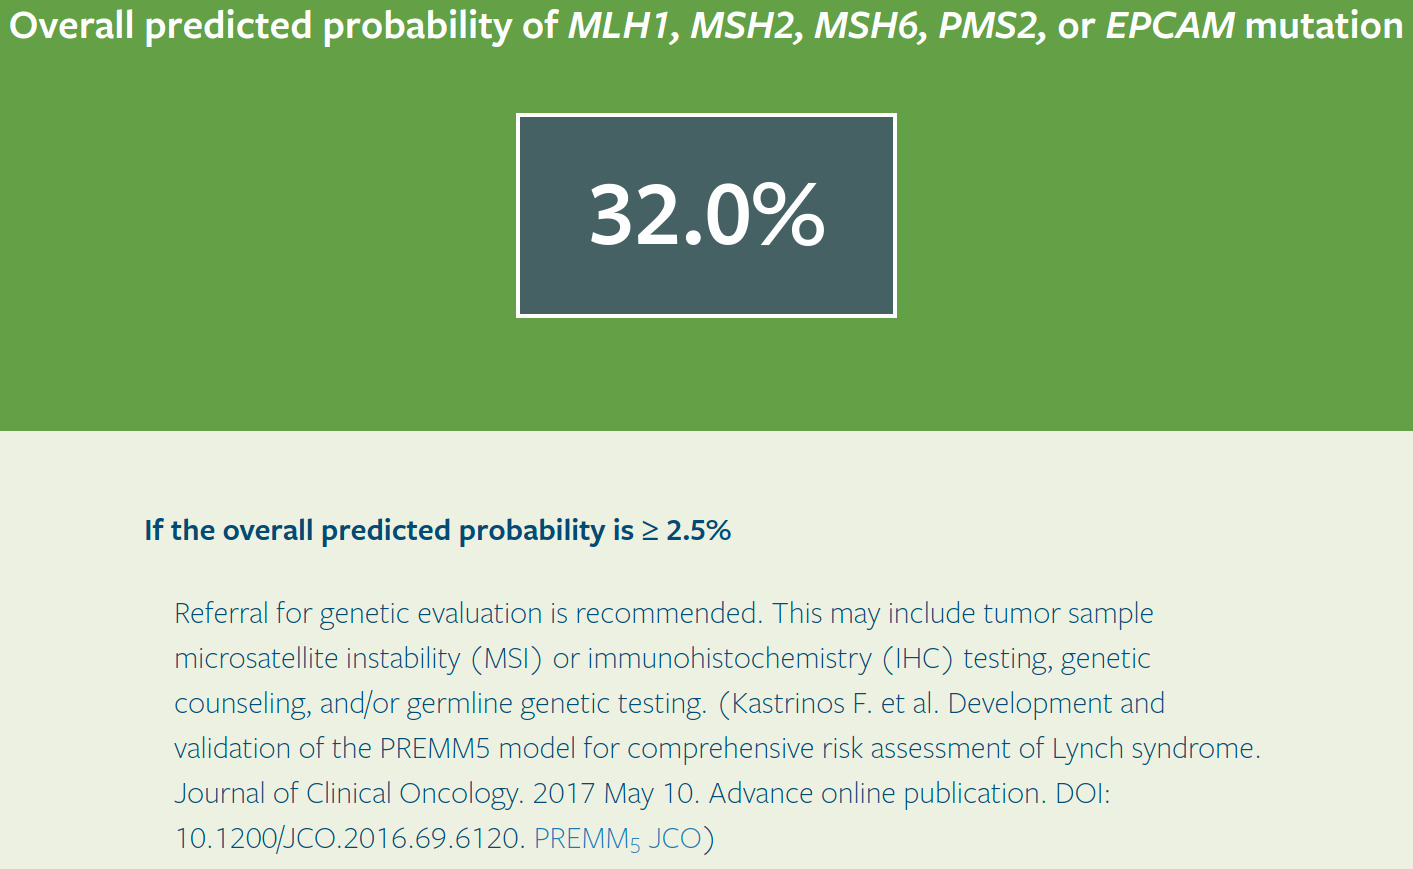

Supplement: supp [file elife-68699-supp-v1.zip › elife_poa_e68699_Figure_7_figure_supplement_3.jpg]

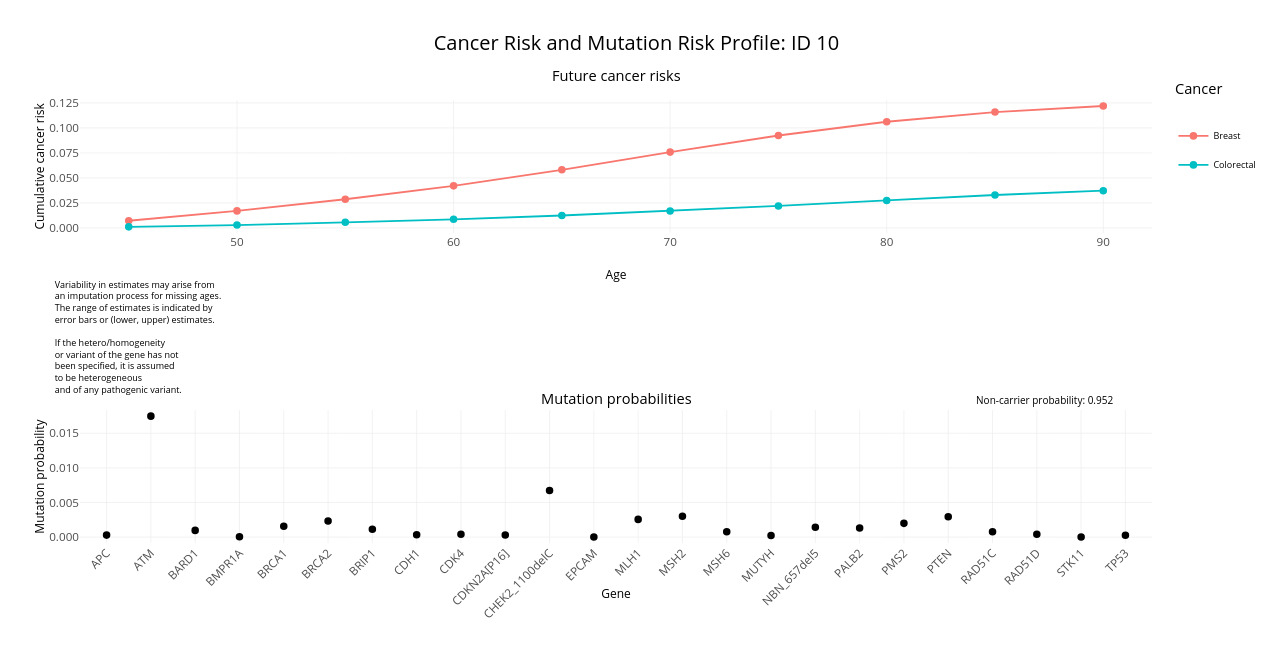

Supplement: supp [file elife-68699-supp-v1.zip › elife_poa_e68699_Figure_8_figure_supplement_1.jpg]

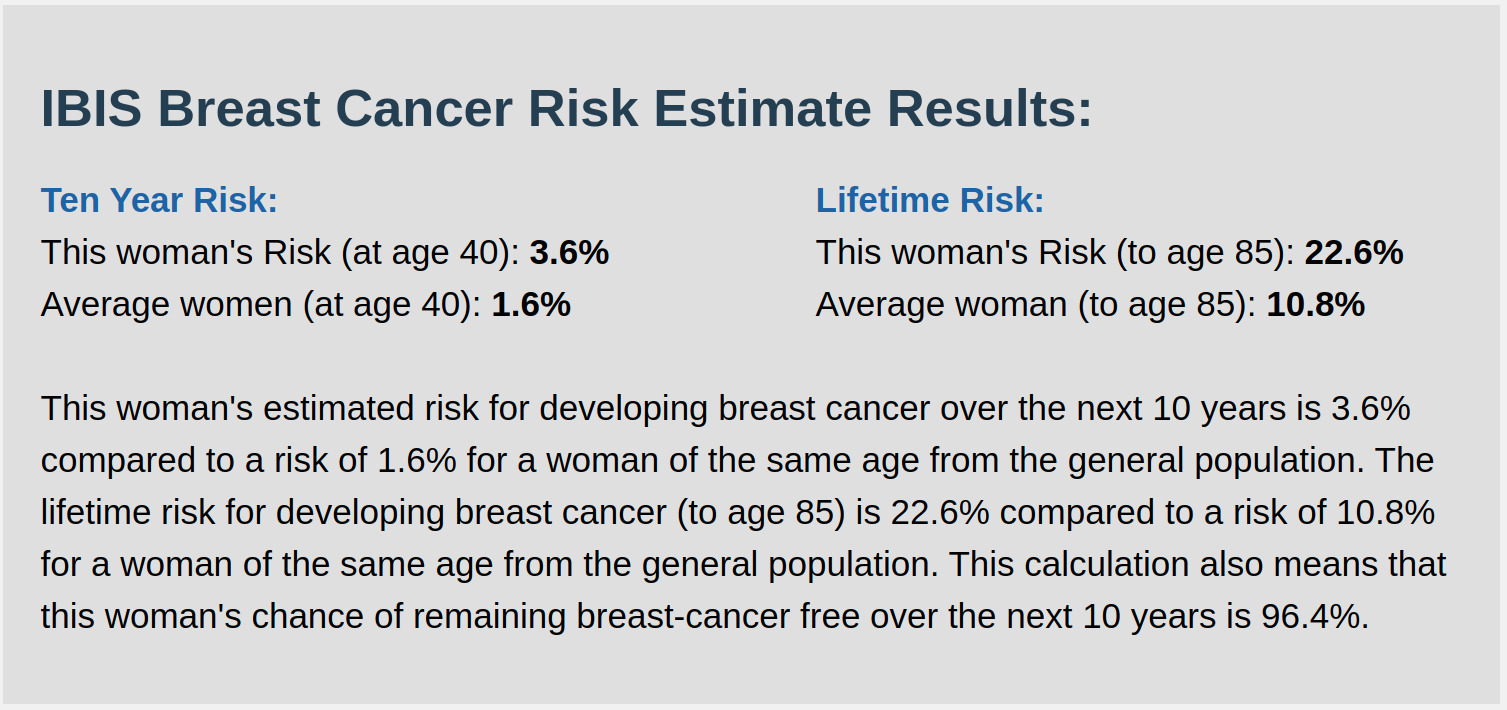

Supplement: supp [file elife-68699-supp-v1.zip › elife_poa_e68699_Figure_8_figure_supplement_4.jpg]

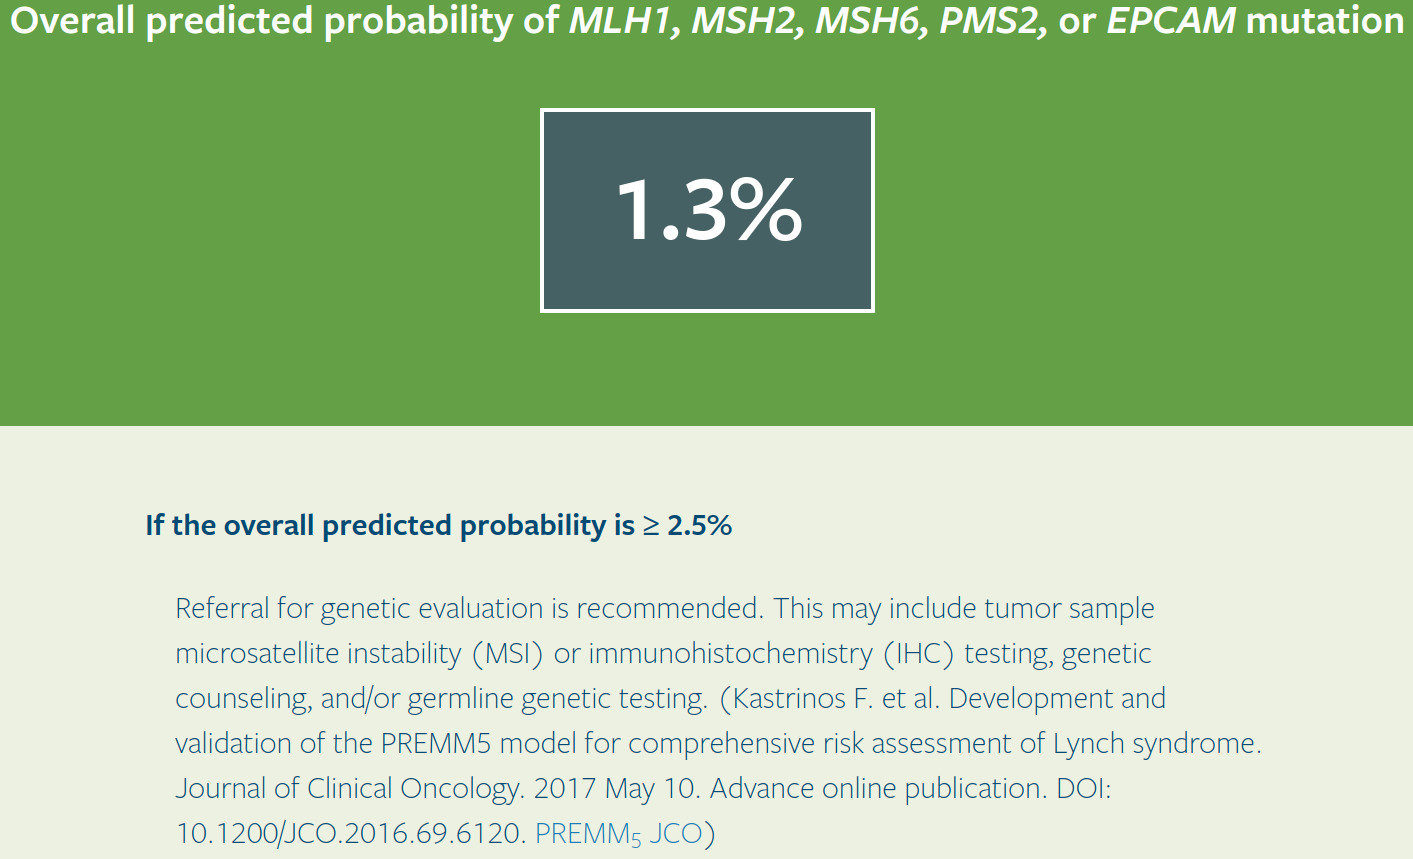

Supplement: supp [file elife-68699-supp-v1.zip › elife_poa_e68699_Figure_8_figure_supplement_5.jpg]

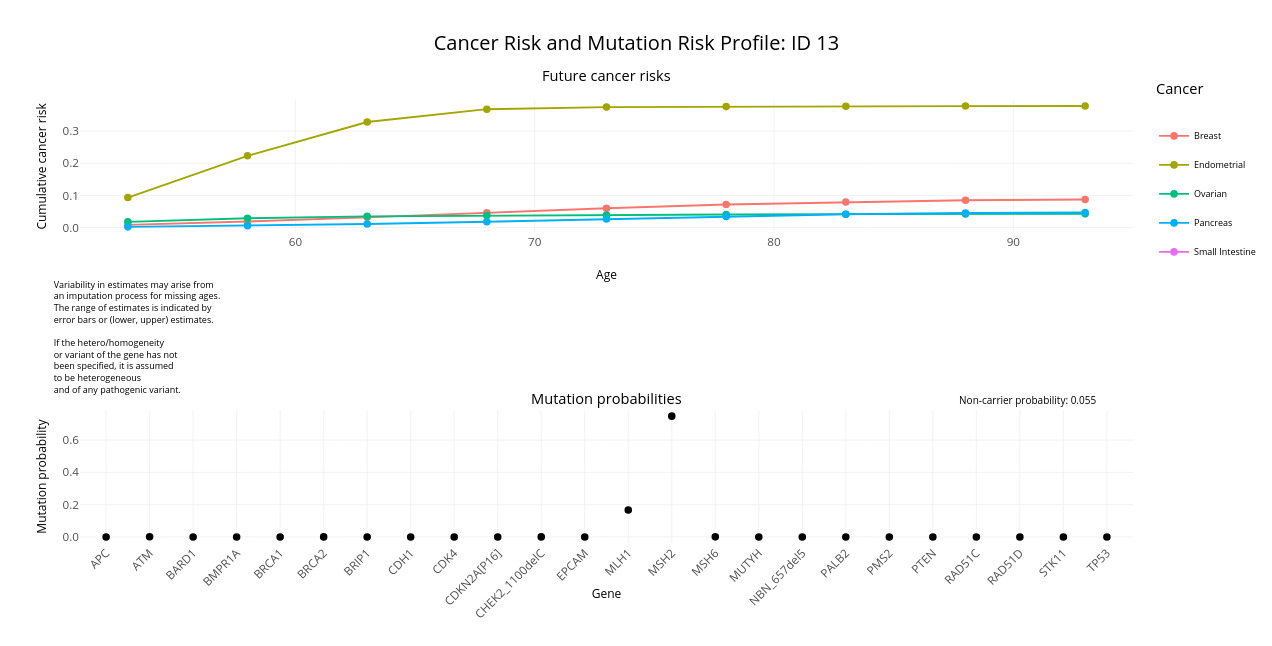

Supplement: supp [file elife-68699-supp-v1.zip › elife_poa_e68699_Figure_9_figure_supplement_1.jpg]

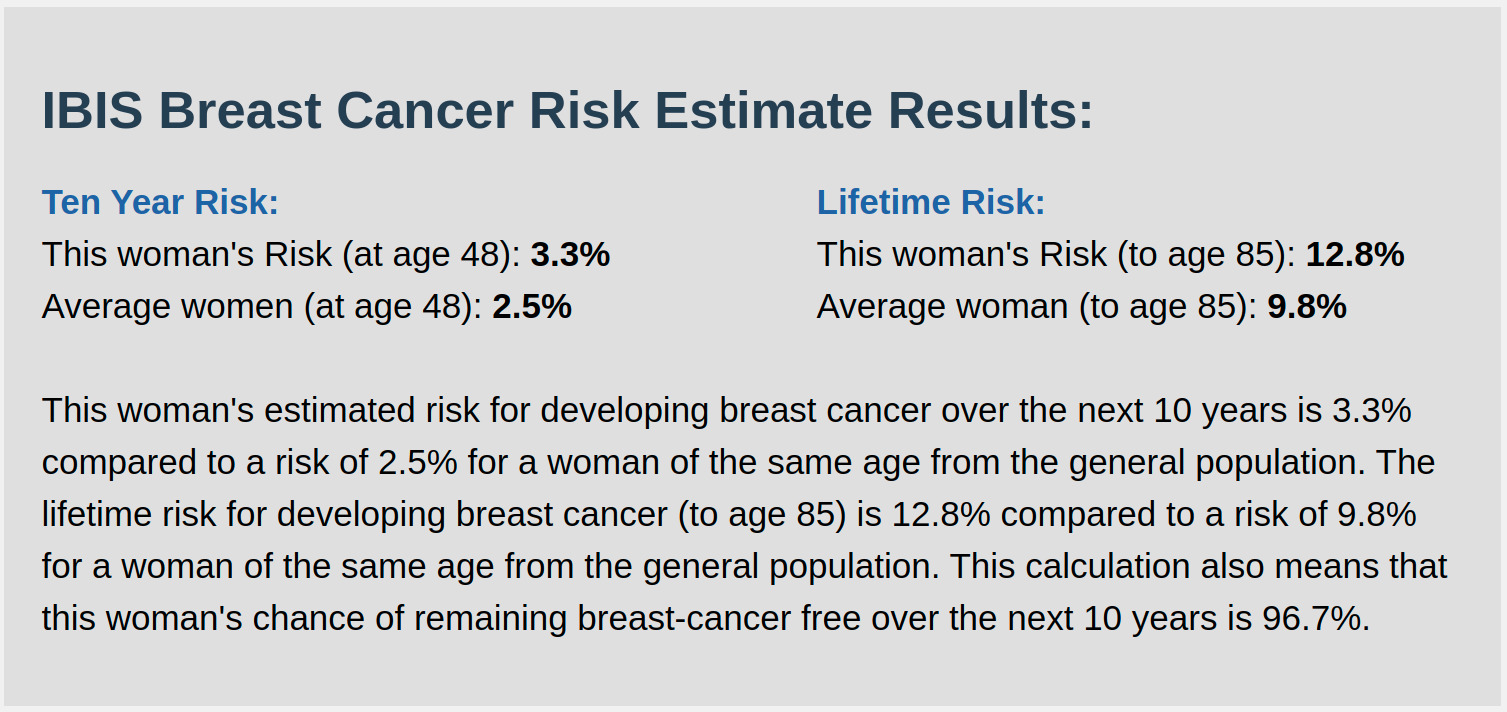

Supplement: supp [file elife-68699-supp-v1.zip › elife_poa_e68699_Figure_9_figure_supplement_4.jpg]

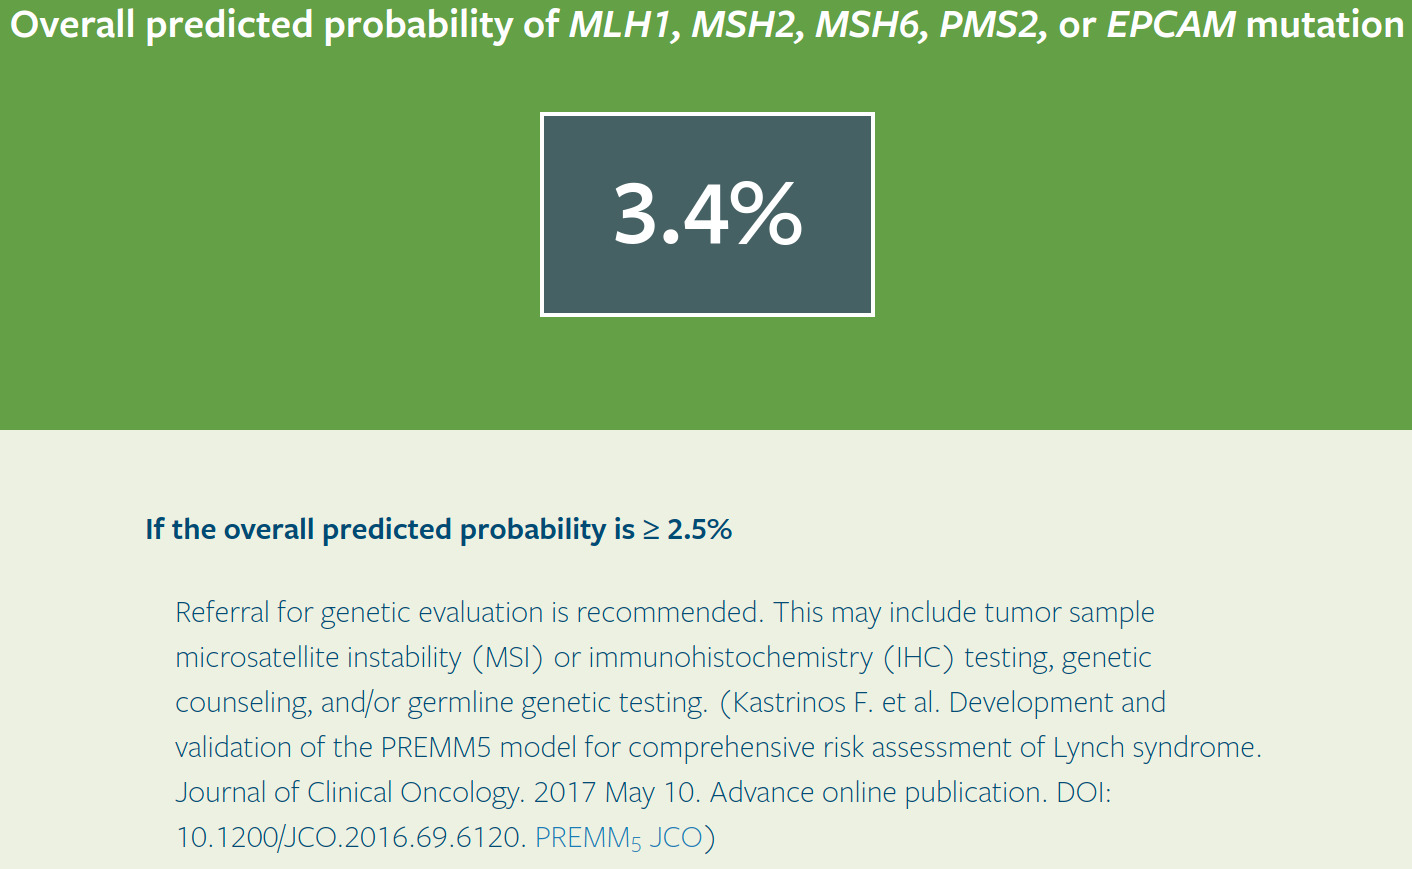

Supplement: supp [file elife-68699-supp-v1.zip › elife_poa_e68699_Figure_9_figure_supplement_5.jpg]
